# Supplementary material
Source: Springer Nature journal article supplement (https://www.springermedizin.de/resource/supplementary/12885_2010_2617_MOESM3_ESM.pdf/9461582)

# OSA16

rcIL6 30ng/mL

0'

5'

10'

30'

pSTAT3

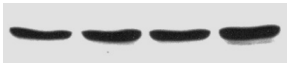

STAT3

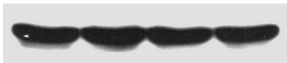

pJAK2

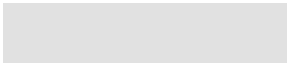

JAK2

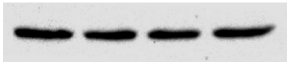

Supplement: MOESM3 [file 9461582]
